# Supplementary material
Source: PubMed Central journal article supplement (PMC2996011)
Supplement: pp.110.163683_1.pdf [file pp.110.163683_1.pdf]

**Supplemental Material for “Comprehensive analysis of *CLE* gene expression and over-expression activity in Arabidopsis”**

This PDF file contains:

Supplemental Methods

Supplemental References

Supplemental Tables S1 through S3

Supplemental Figures S1 through S7

## Supplemental Methods

### *Construction of Transgenic Constructs*

For *CLE1~CLE8*, *CLE16~CLE18*, *CLE22*, and *CLE25~27*, the PCR fragment was cloned into pENTR<sup>TM</sup>/D-TOPO (Invitrogen), then recombined into pBGWFS7,0 using Gateway LR recombination (Invitrogen). For *CLE9* and *CLE10*, each 5' upstream region was cloned into pCR Blunt II TOPO, excised using HindIII and BamHI, and cloned into pBI101. For *CLE11~CLE13*, each 5' upstream region was ligated into pCR2.1 and cloned into the NotI site of binary vector pMLBART (Gleave, 1992). For *CLE21* the 5' upstream region was amplified by PCR, and a second PCR was run with attB adapter primers to complete the attB recombination site on the PCR product. The PCR product was recombined into the GUS-GFP vector pDONR201 using BP recombinase and then recombined into pBGWFS7 using LR recombinase (Invitrogen). To generate the *CLE14* and *CLE20* promoter::GFP translational fusion constructs, the 5' upstream region and coding sequence was PCR-amplified and cloned into SacI and BamHI restriction sites of pEZS-NL (Carnegie Institution). Then a SacI and NotI fragment containing the promoter and coding sequence fused to GFP and *OCS* 3' terminator was excised and cloned into binary vector pART27 (Gleave, 1992). Primer sequences are listed in Table S5.

The *CLE* over-expression constructs were created by cloning each full-length *CLE* cDNA into a binary vector for plant transformation. The *CLE8* coding sequence was PCR amplified and cloned into pENTR<sup>TM</sup>/D-TOPO and then recombined into the binary vector pMDC32 (Curtis and Grossniklaus, 2003). The *CLE12* cDNA was inserted into the EcoRI site of pBJ36/35S behind the CaMV 35S promoter, and this cassette then excised and cloned into pMLBART at the NotI site. The *CLE16* and *CLE17* cDNAs were cloned into the EcoRI and SpeI sites of pCD223 (kindly provided by Chris Day), flanked 5' by a double CaMV 35S promoter and 3' by a nopaline synthase transcription termination signal. The *CLE22* and *CLE27* cDNAs were cloned into pCR2.1 using the EcoRI restriction site, and a NotI cassette containing the CaMV 35S promoter and cDNA was excised and cloned into the NotI site of pART27 (Gleave, 1992).

### *CLE10 Reporter Expression Analysis*

In contrast to all other A-type *CLE* promoters, the *CLE10* promoter drove two distinct patterns of reporter expression in independent T1 transformants. The first pattern, observed in 38% of T1 plants, showed promoter activity in the rosette and cauline leaf margins, the abscission zone of

floral organs, the pedicel branch points, and the septum, style, ovary and ovules of the gynoecium in young developing flowers (see main text). The second pattern, observed in 27% of T1 plants, consisted of promoter activity in the root tip, stem, stomata on the stem epidermis, abscission zones and leaf margins, stronger promoter activity at the pedicel branch points, and faint promoter activity in the leaf vasculature including the hydathodes. These two patterns share reporter expression in the pedicel branch points, abscission zones, and leaf margins. A further 27% of plants showed weak reporter gene expression in only the pedicel branch points and floral organ abscission zones. The plants maintained their reporter expression patterns in subsequent generations, suggesting that the differences are not due to transient variability.

We produced two independent *CLE10* reporter constructs to verify that the distinct GUS expression patterns were not an artifact of the original construct. For the first construct, the *CLE10* upstream region was amplified using primers oAR106 and oAR107 and cloned into pCR-Blunt TOPO (Invitrogen). The promoter was excised with BamH1 and HindIII and cloned into pBI101 to create pAR77 (*CLE10::GUS*). We observed that 5 T1 plants carrying pAR77 showed expression pattern 1, 7 showed expression pattern 2, and 4 showed no expression. For the second construct, the *CLE10* upstream region up to the preceding gene was amplified using primers oAR374 (CACCGATGATTGATCGGCGAGAGAA) and oAR431 (CGTTGTGGAGAGAGAGAGAGATCTTCGA). The promoter was cloned into pENTR d TOPO (Invitrogen) and LR recombined into pBWGSF7 to create pAR184 (*CLE10::GFP-GUS*). We observed that 20 T1 plants carrying pAR184 showed expression pattern 1, 11 showed expression pattern 2, 18 showed the weak expression pattern, and 1 showed no expression. Thus the two GUS expression patterns are intrinsic to the *CLE10* upstream region and not due to vector-specific artifacts. These data suggest that the *CLE10* upstream region is insufficient to dictate a consistent GUS reporter pattern and that additional influences, potentially including downstream regulatory elements and/or local chromosome structure, play an important role in determining the expression pattern.

### Supplemental References

**Curtis MD, Grossniklaus, U** (2003) A gateway cloning vector set for high-throughput functional analysis of genes *in planta*. *Plant Physiol.* **133**: 462-469

**Gleave AP** (1992) A versatile binary vector system with a T-DNA organizational structure conducive to efficient integration of cloned DNA into the plant genome. *Plant Mol. Biol.* **20**: 1203-1207

Supplemental Table 1. *CLE* over-expression meristem phenotypes.

| <i>CLE</i> Gene | Dodecapeptide Sequence | AGI/<br>Accession No. | Size (aa) | p35S: <i>CLE</i> Phenotype |     |
|-----------------|------------------------|-----------------------|-----------|----------------------------|-----|
|                 |                        |                       |           | SAM                        | RAM |
| <i>CLE8</i>     | RRVPTGNPLHH            | At1g67775             | 86        | -                          | -   |
| <i>CLE12</i>    | RRVPSGNPLHH            | At1g68795             | 118       | +                          | +   |
| <i>CLE16</i>    | RLVHTGNPLHN            | At2g01505             | 103       | -                          | +   |
| <i>CLE17</i>    | RVVHTGNPLHN            | At1g70895             | 99        | -                          | +   |
| <i>CLE22</i>    | RRVFTGNPLHN            | At5g12235             | 103       | +                          | +   |
| <i>CLE27</i>    | RIVPSCPDPPLHN          | At3g25905             | 91        | -                          | +   |

Each color in the *CLE* dodecapeptide sequence represents a different amino acid residue. SAM (shoot apical meristem) or RAM (root apical meristem) termination is denoted by a plus sign (+), whereas a minus sign (–) indicates no meristem termination phenotype.

Supplemental Table 2. *CLE* insertion alleles.

| <i>CLE</i> Gene          | Allele Name    | Insertion Site Relative to ATG | Insertion Line ID Number | Affect on Transcript Levels |
|--------------------------|----------------|--------------------------------|--------------------------|-----------------------------|
| <i>CLE1</i> (At1g73165)  | <i>cle1-1</i>  | +210 bp (CDS)                  | RATM12-0322-1_H          | Absent                      |
| <i>CLE2</i> (At4g18510)  | <i>cle2-1</i>  | +360 bp                        | SALK_109358              | None                        |
|                          | <i>cle2-2</i>  | +256 bp (3'UTR)                | GK_471C05                | None                        |
| <i>CLE3</i> (At1g06225)  | <i>cle3-1</i>  | -36 bp (5' UTR)                | RATM15-0143-1_G          | Slightly reduced            |
| <i>CLE4</i> (At2g31081)  | <i>cle4-1</i>  | +505 bp                        | SALK_048896              | None                        |
| <i>CLE6</i> (At2g31085)  | <i>cle6-1</i>  | -289 bp                        | GK_521E09                | Slightly increased          |
| <i>CLE7</i> (At2g31082)  | <i>cle7-1</i>  | -56 bp (5' UTR)                | SAIL_108_G05             | Absent                      |
| <i>CLE9</i> (At1g26600)  | <i>cle9-1</i>  | -62 bp (5' UTR)                | WisDsLox297300_04B       | Slightly increased          |
| <i>CLE10</i> (At1g69320) | <i>cle10-1</i> | +72 bp (CDS)                   | GARLIC_1147_A10          | Nearly absent               |
| <i>CLE13</i> (At1g73965) | <i>cle13-1</i> | +405 bp (3' UTR)               | GK_549B08                | Reduced                     |
| <i>CLE16</i> (At2g01505) | <i>cle16-1</i> | +37 bp (CDS)                   | RATM11-1864-1_G          | Absent                      |
| <i>CLE17</i> (At1g70895) | <i>cle17-1</i> | +412 bp (3'UTR)                | SALK_094989              | Reduced                     |
|                          | <i>cle17-2</i> | -689 bp                        | SALK_103714              | Slightly increased          |
| <i>CLE18</i> (At1g66145) | <i>cle18-1</i> | +188 bp (CDS)                  | GK_479A03                | Absent                      |
| <i>CLE19</i> (At3g24225) | <i>cle19-1</i> | -49 bp (5' UTR)                | GK_232C03                | Reduced                     |
| <i>CLE21</i> (At5g64800) | <i>cle21-1</i> | -248 bp                        | SALK_088408              | None                        |
|                          | <i>cle21-2</i> | -108 bp                        | GK_203E06                | None                        |

The ATG site is denoted as +1 bp. bp, base pairs; CDS, coding sequence; UTR, untranslated region.

Supplemental Table 3. Oligonucleotides used in this study.

| Purpose                   | Gene         | Name                            | Sequence                                                   |
|---------------------------|--------------|---------------------------------|------------------------------------------------------------|
| Cloning                   |              |                                 |                                                            |
| p <i>CLE:Reporter</i>     | <i>CLE1</i>  | CLE1p5FG                        | CACCTTTTATTTGTTTCATACATTGTTAC                              |
|                           |              | CLE1p5RG                        | GTGTTATGTGACAATGGTTTCA                                     |
|                           | <i>CLE2</i>  | CLE2p5'FG                       | CACC TGATAAAGGCAAAACCCAAATCAG                              |
|                           |              | CLE2p5'RG                       | TACAGATACAATTAATTAGTTTCTG                                  |
|                           | <i>CLE3</i>  | CLE3p5'FG                       | CACCTGATCTCTGCACTTTTTTCATAT                                |
|                           |              | CLE3p5'RG                       | ATATATGTAACTTCCTCTTAGTTC                                   |
|                           | <i>CLE4</i>  | CLE4p5FG                        | CACCGAAAATCATTAAACAACGTAGTAC                               |
|                           |              | pCLE4-R1                        | ACCCATAACTTGAAACTTGCCATA                                   |
|                           | <i>CLE5</i>  | pCLE5(83)RG                     | AATAGAGGAAGAAATTAAGGTGAATTGG                               |
|                           |              | pCLE5-F1                        | CACC ATTGCACTACATTTAATTCGCAGT                              |
|                           | <i>CLE6</i>  | CLE6p5FG                        | CACCATGATCGATACCTAAATAAAATACT                              |
|                           |              | CLE6p5RG                        | TAAAGGTGATTAAGAAGAAGAAA                                    |
|                           | <i>CLE7</i>  | pCLE7-F1                        | CACCAATGATGAGTAGTTTTATAACCTTTT                             |
|                           |              | pCLE7-R3 (cds)                  | AGGTGAGCATAACAAATAACAATA                                   |
|                           | <i>CLE8</i>  | CLE8_FW                         | CACCAAGAAGCATAAACTACAAGAAAGG                               |
|                           |              | CLE8_RV                         | TTTCTCTCCTTTTTTTTTTTTTTACTTTTAGTTTCTCATGTAC<br>TTCTTTTTAGC |
|                           | <i>CLE9</i>  | oAR102                          | GAAGCTTATCAGAACCTGAGAACTATAG                               |
|                           |              | oAR103                          | GGGATCCTGTTTTGGTTTCCAAGAGAGAG                              |
|                           | <i>CLE10</i> | oAR106                          | GAAGCTTTCACGGATTAACACGAGACAC                               |
|                           |              | oAR107                          | GGGATCCCCTGTGTGGAGAGAGAGAGAGATC                            |
|                           | <i>CLE11</i> | 5' 11-F                         | GGACATTTGTATATGCGCATG                                      |
|                           |              | 5' 11-R                         | GGCCTTGTAGCTAGAGAAGA                                       |
|                           | <i>CLE12</i> | 5' 12-F2                        | AGACTTTCCTGCACTGCTCGT                                      |
|                           |              | 5' 12-R                         | GGAAGATGATGAAGAAATTCTAAGC                                  |
|                           | <i>CLE13</i> | 5' 13-F                         | GGAGATTAAAGATCATAGGACC                                     |
|                           |              | 5' 13-R                         | TGTTAGCCGGAGATGTAACC                                       |
|                           | <i>CLE16</i> | p16-F                           | CACC CTCACTTACTGGTGTCTT                                    |
|                           |              | p16-R1 cds                      | TTCTGGAACAAGCTTCCA                                         |
|                           | <i>CLE17</i> | p17-F                           | CACC GTAAGGAATTTAGGAGATGA                                  |
|                           |              | p17-R                           | CTCACAAAACCTTGTTCCG                                        |
|                           | <i>CLE18</i> | CLE18_FW                        | CACCATAGCTTGAAGAAACAGAGGATTG                               |
|                           |              | CLE18_RV                        | CTTTCTGATCCTTATTTTTTGCTTTTTG                               |
|                           | <i>CLE21</i> | oAR210                          | AAAAAGCAGGCTGCAATTTGGAGGGATTATTTCGACAC                     |
|                           |              | oAR211                          | AGAAAGCTGGGTAGATATCGAAAAAAGTATGTTTGAATC                    |
|                           | <i>CLE22</i> | CLE22pFOR                       | CACCAACAAATTACAGTCAGCCCT                                   |
|                           |              | CLE22pREV                       | CTCTTAGGAATCTTCAAGA                                        |
|                           | <i>CLE25</i> | P25FG2                          | CACCAGCCACAGTGATTGTCGACAGTTA                               |
|                           |              | CLE25p5RG                       | ACTGAAACCTATGTCCCTACAGC                                    |
|                           | <i>CLE26</i> | CLE26p5'FG                      | CACCAAGAACCATTCTCGGTATGTAAA                                |
|                           |              | CLE26p5'RG                      | GGTTTCTAGCCTTTGTGGATATG                                    |
| <i>CLE27</i>              | pCLE27F35    | CACCTCCAGGAGGCTAAACCTGCAATAAGTA |                                                            |
|                           | CLE27p5RG    | ATCCCAAACCTAAACCCTAACATAA       |                                                            |
| p <i>CLE:CLE:Reporter</i> | <i>CLE14</i> | SacpCLE14 5F                    | CGAGCTCAATAATAACATCATTGATCTC                               |
|                           |              | BamCLE14 3R                     | GCGGATCCCG TTTGTTGTGAAGCGGGTTAGGAC                         |
| <i>CLE20</i>              | Pcle20-5F-1  | AACATGCGAAGAAGCTCGAGA           |                                                            |
|                           | BamCLE20 3R  | GCGGATCCCGTCGTTTGTGTGCAAAGG     |                                                            |
| 35S: <i>CLE</i>           | <i>CLE8</i>  | CLE8_ox_FW                      | CACCATGAAAGTGTGAAGAGAGATTC                                 |
|                           |              | CLE8_ox_RV                      | TCAGTTCCTAGCATAGTTTAGACTTC                                 |
|                           | <i>CLE12</i> | CLE12A-F                        | ATGGCCTTGAAATTTTCTCAAATTC                                  |
|                           |              | CLE12-R                         | CAATGGTGCAACGGATTGGG                                       |
|                           | <i>CLE16</i> | 16ox-F                          | GGAATTCCATGGAAGCTTGTCCAGAA                                 |
|                           |              | 16ox-R                          | GACTAGTTCAGTTGTGAAGAGGATTTGGA                              |
|                           | <i>CLE17</i> | 17ox-F                          | GGAATTCATGACTCACGTGTTGGTACG                                |
|                           |              | 17ox-R                          | GACTAGTGTAGTTGTGGAGAGGATTG                                 |

|                     |                  |              |                                 |                       |
|---------------------|------------------|--------------|---------------------------------|-----------------------|
|                     | <i>CLE22</i>     | CLE22F       | ATGGGAAATTACTACTCT              |                       |
|                     |                  | CLE22R       | TCTATTGTGCAATGGATT              |                       |
|                     | <i>CLE27</i>     | CLE27F-TIGR  | ATGACTCATGCTCGAGAATGGAG         |                       |
|                     |                  | CLE27R-TIGR  | CTAGTTATGCAAAGGATCCGGAC         |                       |
| Expression analysis |                  |              |                                 |                       |
| RT-PCR              | <i>CLE1</i>      | 1-mi-F       | GAAATTCCTTGCTGTGCTTG            |                       |
|                     |                  | CLE1-t-R     | TTCTAAACCGGTTCTCGATCA           |                       |
|                     | <i>CLE7</i>      | 7ox-F(g)     | ATGGCTTCTAAAGCGTTATTGT          |                       |
|                     |                  | 7ox-R(g)     | TCAAATTCTAGGTTTTGAAGACA         |                       |
|                     | <i>CLE16</i>     | 16ox-F       | CATGGAAGCTTGTTCCAGAA            |                       |
|                     |                  | 16ox-R       | TCAGTTGTGAAGAGGATTTGGA          |                       |
|                     | <i>CLE17</i>     | 17ox-F       | ATGACTCACGTGTTGGTACG            |                       |
|                     |                  | 17ox-R       | GTTAGTTGTGGAGAGGATTG            |                       |
|                     | <i>CLE18</i>     | cle18ATG f   | ATGCATTTGTTAAAAGGTGGTG          |                       |
|                     |                  | cle18-2 rv   | GTTTTGGTGAAGGCTGAGGA            |                       |
|                     | <i>CLE27</i>     | 27-F(g)      | ATGACTCATGCTCGAGAATG            |                       |
|                     |                  | 27-R(g)      | CTAGTTATGCAAAGGATCCG            |                       |
|                     | <i>CLE8</i>      | CLE8 RT FW   | ATGAAAGTGTGAAGAGAGATTC          |                       |
|                     |                  | CLE8 RT RV   | TCAGTTCCTAGCATAGTTTAGACTTC      |                       |
|                     | <i>CLE12</i>     | CLE12 RT FW  | GGATCCATGGCCTTGAAATTTCT         |                       |
|                     |                  | CLE12 RT RV  | TCGGCTGTTATCTCGGCTAT            |                       |
|                     | <i>CLE19</i>     | CLE19 FW     | ATGAAGATAAAGGGTTTGATGA          |                       |
|                     |                  | CLE19 RV     | ATCCACTCCACAACAGGTAA            |                       |
|                     | <i>CLE2</i>      | CLE2F        | GGATCCATGGCTAAGTTAAGCTTC        |                       |
|                     |                  | CLE2R        | GGATCCCTAGTGATGTTGTGGGTC        |                       |
|                     | <i>CLE3</i>      | 3-mi-F       | GACTAGTGCTTCTAGTACTCGAATTGA     |                       |
|                     |                  | 3ox-R(g)     | TCAGTGATGCCTCGGGTC              |                       |
|                     | <i>CLE4</i>      | CLE4F        | GGATCCATGGCAAGTTTCAAGTTA        |                       |
|                     |                  | CLE4R        | GGATCCGTGATGTCTAGGGTCCGG        |                       |
|                     | <i>CLE6</i>      | 6-mi-F       | AACTGCAG GCAATCTCTAATCATACTC    |                       |
|                     |                  | 6-mi-R3'     | AACTGCAGACAAAAGTGTAGGGAAAGATT   |                       |
|                     | <i>CLE9</i>      | oAR441       | TCTGATCTTGATCTCTCTTCTCTTCGTCCTC |                       |
|                     |                  | oAR442       | AGTTGTGAAGCGGGTTTGGACCAGAGGGGA  |                       |
|                     | <i>CLE10</i>     | oAR403       | CAAGAACTGGACCAACCGAACTC         |                       |
|                     |                  | oAR126       | CGTACCTTTGATCAATCTCCGTCTC       |                       |
|                     | Mutant screening |              |                                 |                       |
|                     | Genotyping       | <i>CLE1</i>  | CLE1-ko(1)                      | ACATTACTCAGATCCTTTGCT |
| CLE1-ko(2)          |                  |              | ACACGAGCCATTAGAGACT             |                       |
| <i>CLE7</i>         |                  | 7-ko(1)      | AGGTCAAGTAAATCTAGTGGA           |                       |
|                     |                  | 7-ko(2)      | TGGTGAACAAGTGAGGAGGT            |                       |
| <i>CLE16</i>        |                  | p16-F        | CACCCTTCACTTACTGGTGCTCTT        |                       |
|                     |                  | 16ox-R       | GACTAGTTCAGTTGTGAAGAGGATTTGGA   |                       |
| <i>CLE17</i>        |                  | 17ox-F       | GGAATTCATGACTCACGTGTTGGTACG     |                       |
|                     |                  | 17-ko(2)     | AATTATGAGGGCAGATGCTG            |                       |
|                     |                  | CLE17RNAi-R  | TCTGCTCAATGGCCACGAAA            |                       |
| <i>CLE18</i>        |                  | 17-ko(1)     | ACATGGGTTCAATTTGCGTGA           |                       |
|                     |                  | cle18ATG f   | ATGCATTTGTTAAAAGGTGGT           |                       |
| <i>CLE19</i>        |                  | cle18r-stop  | GGATCCCTACAGTCCAATCAAATG        |                       |
|                     |                  | cle19 ko FW  | AAATGTGTCCACAGGCCACT            |                       |
|                     |                  | cle19 ko RV  | GATCGTTCCCATGGAGTCAT            |                       |
| <i>CLE2</i>         |                  | cle19 ko RV1 | ATCCACTCCACAACAGGTAA            |                       |
|                     |                  | 2-ko(1)      | GTA AACAGAAATCATGTGTACGT        |                       |
|                     |                  | 2-ko(2)      | GACGGTCGAGTTATAAATGGT           |                       |
| <i>CLE3</i>         |                  | C2-ISf       | GGAATTCACAGAACTAATTAATTGTATCTGT |                       |
|                     |                  | CLE3pseq591  | CATGCTCCATAATCAGCTT             |                       |
|                     |                  |              | 3ox-R(g)                        | TCAGTGATGCCTCGGGTC    |
|                     | <i>CLE4</i>      | 4-ko(1)      | CTTAGTGCACACATGAGTAT            |                       |



|              |  |                |                                   |
|--------------|--|----------------|-----------------------------------|
|              |  | CLE4-s(5)      | GAGTACGTA <del>CTT</del> CTACTATT |
| <i>CLE6</i>  |  | CLE6p5FG       | CACCATGATCGATACCTAAATAAATACT      |
|              |  | CLE6p5RG       | TAAAGGTGATTAAGAAGAAGAAA           |
|              |  |                |                                   |
| <i>CLE9</i>  |  | oAR230         | TTCCTTTTTCGAGCTTTCACC             |
|              |  | oAR231         | AGGAGGAGAAAGAAGTGGCTG             |
| <i>CLE10</i> |  | oAR205         | GTCACCTCTAGTATTTGGCGGCGA          |
|              |  | oAR126         | CGTACCTTTGATCAATCTCCGTCG          |
| <i>T-DNA</i> |  | Ds3'-2a        | CGATTACCGTATTTATCCCGTTC           |
|              |  | SAIL_LB3       | AATTTCATAACCAATCTCGATACAC         |
|              |  | Ds5'-2a        | TCCGTTCCGTTTTTCGTTTTTAC           |
|              |  | SALK-LB(b1)    | GCGTGGACCGCTTGCTGCAACT            |
|              |  | gabi-kat PCR   | GGATCCCTACAGTCCAATCAAATG          |
|              |  | SAIL_LB3       | AATTTCATAACCAATCTCGATACAC         |
|              |  | WiscDsLox p745 | AACGTCCGCAATGTGTTATTAAGTTGTC      |

## Supplemental Figure Legends

**Supplemental Figure 1.** *CLE14* and *CLE20* promoter activity. (A) *CLE20* is not expressed in the shoot apex or leaves of a 10-day-old seedling. (B) *CLE20* in the root vascular protoxylem and metaxylem. (C, D) *CLE20* in lateral root primordia. (E) *CLE14* in the trichomes of a 10-day-old seedling. (F) *CLE14* in root epidermal cells. (G) *CLE14* in the trichomes of a rosette leaf. (H) *CLE14* in the sepal trichomes on the inflorescence apex. Arrows in (C, D) and arrowhead in (D) indicate lateral root initiation point and lateral root tip, respectively. Arrow in (F) indicates the root epidermal layer.

**Supplemental Figure 2.** Examples of *CLE* promoter activity in primary root vasculature. (A) *CLE25* in the metaxylem cells. (B) *CLE22* in the vascular parenchyma. (C) *CLE4* in the pericycle. (D) *CLE7* in the pericycle and endodermis. (E) *CLE1* in the stele and endodermis. Arrows in (A, B) indicate the phloem. Arrowheads indicate protoxylem vessels.

**Supplemental Figure 3.** *CLE* promoter activity during lateral root development. (A-C) *CLE27* in an initiating lateral root. (D-E) *CLE27* in an elongating lateral root. (F-G) *CLE27* in a mature lateral root. (H-I) *CLE2* in an initiating lateral root. (J) *CLE2* at the junction between the primary and lateral root. (K) *CLE11* in an elongating lateral root. (L) *CLE11*, (M) *CLE5* and (N) *CLE6* at the junction between the primary and lateral root. (O, P) *CLE22*, (Q) *CLE25* and (R) *CLE26* in initiating or elongating lateral roots. (S) *CLE4*, (T) *CLE12* and (U) *CLE7* in mature lateral roots.

**Supplemental Figure 4.** *CLE* promoter activity in lateral root tips of 11-day-old seedlings. (A-D) *CLE16* and (E-H) *CLE17* throughout the root cap and apical meristem. (I, J) *CLE11*, (K, L) *CLE13*, (M, N) *CLE18* and (O, P) *CLE1* in the root cap. (Q) *CLE22* in newly differentiating vascular tissue. (R) *CLE25* and (S) *CLE26* in the vascular parenchyma.

**Supplemental Figure 5.** *CLE* promoter activity in the shoot apex region. Longitudinal sections of 10-day-old (A) *pCLE21:GUS*, (B) *pCLE10:GUS*, (C) *pCLE4:GUS* and (D) *pCLE26:GUS* seedlings. Bars: 100  $\mu$ m.

**Supplemental Figure 6.** *CLE16*, *CLE17* and *CLE27* promoter activity in the shoot apex.

(A, B) Serial sections of 10-day-old p*CLE16*:*GUS* seedlings. (C, D) Serial sections of 10-day-old p*CLE17*:*GUS* seedlings. (E, F) Serial sections of 10-day-old p*CLE27*:*GUS* seedlings. The numbers at the left column indicate independently transformed lines. Bar: 100  $\mu$ m.

**Supplemental Figure 7.** *CLE8*, *CLE12* and *CLE22* over-expression phenotypes.

(A) A 13-day-old wild-type seedling. (B) A 13-day-old p35S:*CLE8* seedling. (C) A 13-day-old p35S:*CLE12* seedling. (D) A 13-day-old p35S:*CLE22* seedling. (E) Comparison of root development between a 13-day-old wild-type (left) and a p35S:*CLE12* (right) seedling. (F) Comparison of root development between a 13-day-old wild-type (left) and a p35S:*CLE22* (right) seedling. Arrows indicate the locations of the root tips. Bars: A-D 2.5 mm; E-F 5 mm.

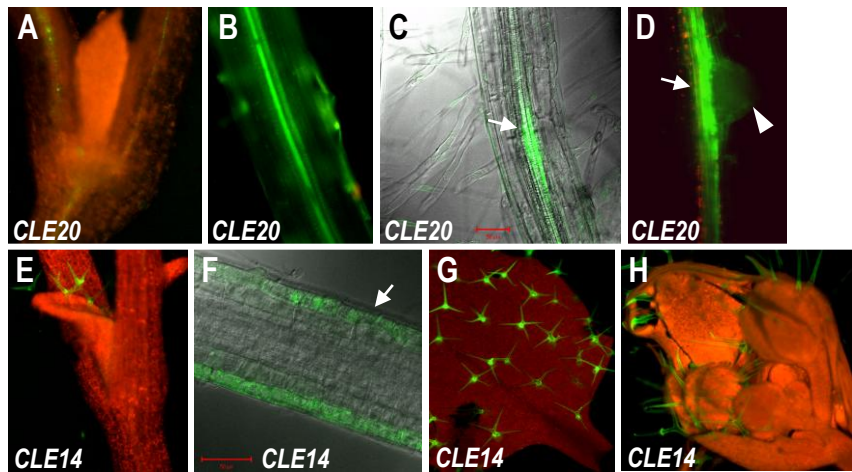

**Supplemental Figure 1.** *CLE14* and *CLE20* promoter activity. (A) *CLE20* is not expressed in the shoot apex or leaves of a 10-day-old seedling. (B) *CLE20* in the root vascular protoxylem and metaxylem. (C, D) *CLE20* in lateral root primordia. (E) *CLE14* in the trichomes of a 10-day-old seedling. (F) *CLE14* in root epidermal cells. (G) *CLE14* in the trichomes of a rosette leaf. (H) *CLE14* in the sepal trichomes on the inflorescence apex. Arrows in (C, D) and arrowhead in (D) indicate lateral root initiation point and lateral root tip, respectively. Arrow in (F) indicates the root epidermal layer.

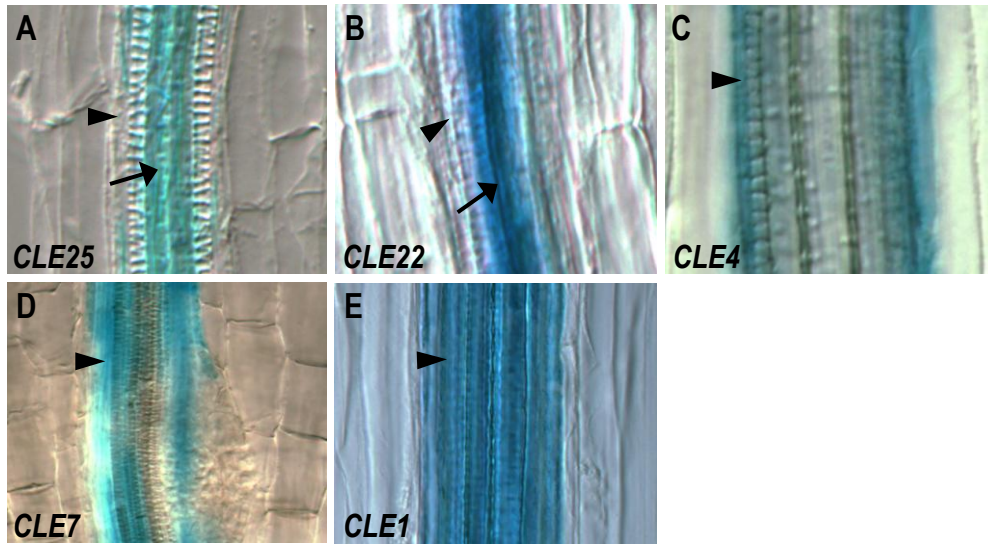

**Supplemental Figure 2.** Examples of *CLE* promoter activity in primary root vasculature. (A) *CLE25* in the metaxylem cells. (B) *CLE22* in the vascular parenchyma. (C) *CLE4* in the pericycle. (D) *CLE7* in the pericycle and endodermis. (E) *CLE1* in the stele and endodermis. Arrows in (A, B) indicate the phloem. Arrowheads indicate protoxylem vessels.

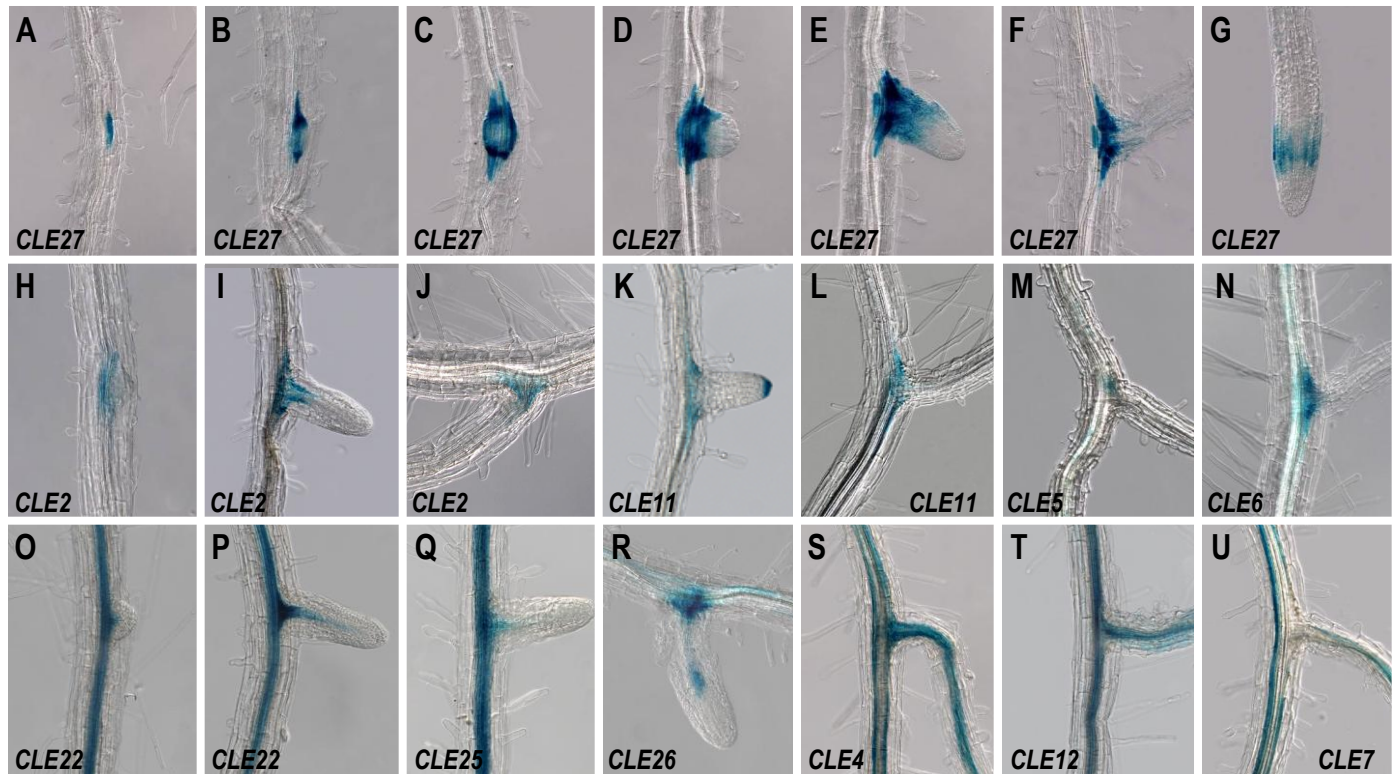

**Supplemental Figure 3.** *CLE* promoter activity during lateral root development. (A-C) *CLE27* in an initiating lateral root. (D-E) *CLE27* in an elongating lateral root. (F-G) *CLE27* in a mature lateral root. (H-I) *CLE2* in an initiating lateral root. (J) *CLE2* at the junction between the primary and lateral root. (K) *CLE11* in an elongating lateral root. (L) *CLE11*, (M) *CLE5* and (N) *CLE6* at the junction between the primary and lateral root. (O, P) *CLE22*, (Q) *CLE25* and (R) *CLE26* in initiating or elongating lateral roots. (S) *CLE4*, (T) *CLE12* and (U) *CLE7* in mature lateral roots.

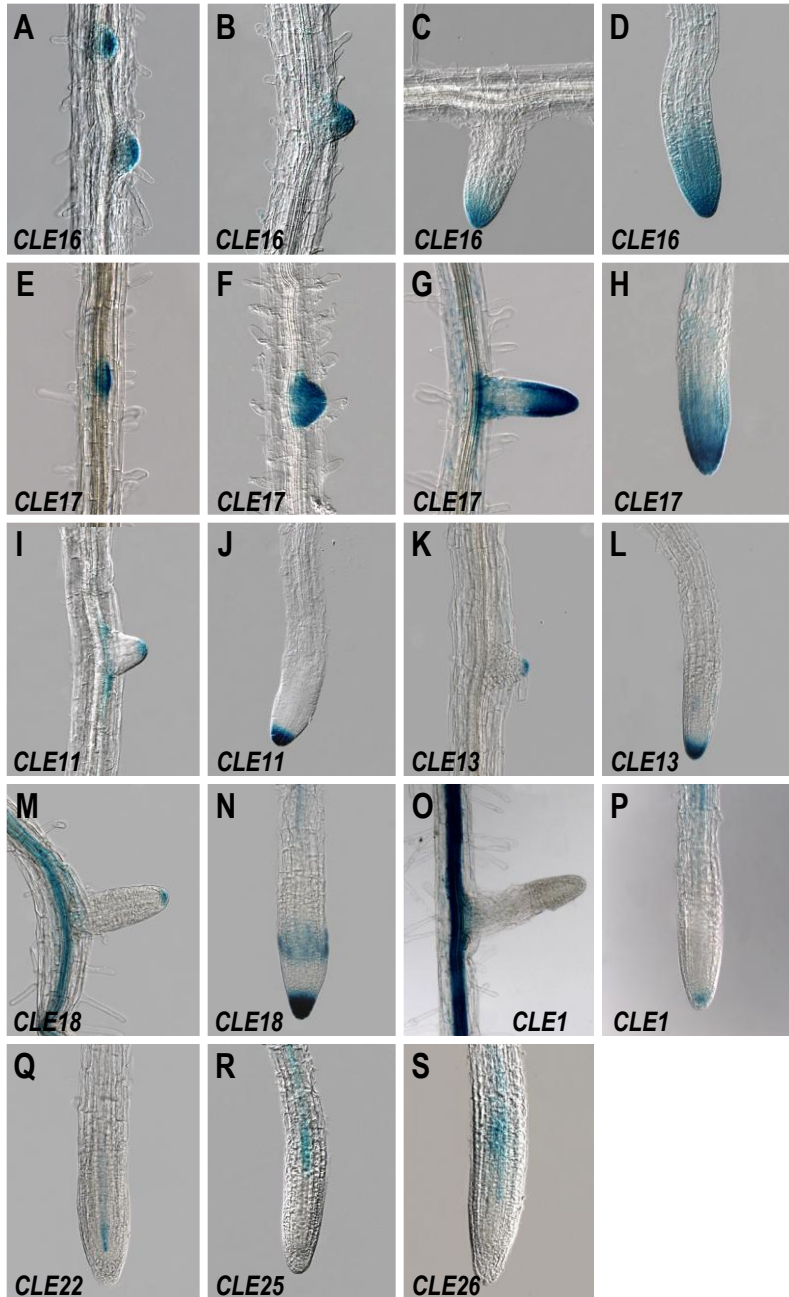

**Supplemental Figure 4.** *CLE* promoter activity in lateral root tips of 11-day-old seedlings. (A-D) *CLE16* and (E-H) *CLE17* throughout the root cap and apical meristem. (I, J) *CLE11*, (K, L) *CLE13*, (M, N) *CLE18* and (O, P) *CLE1* in the root cap. (Q) *CLE22* in newly differentiating vascular tissue. (R) *CLE25* and (S) *CLE26* in the vascular parenchyma.

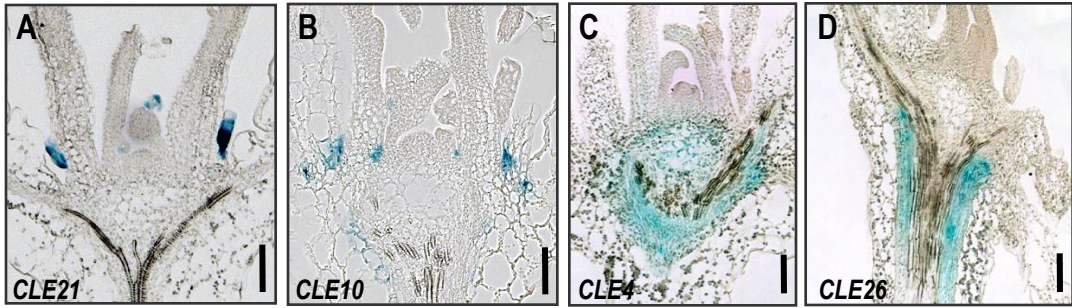

**Supplemental Figure 5.** *CLE* promoter activity in the shoot apex region. Longitudinal sections of 10-day-old (A) *pCLE21:GUS*, (B) *pCLE10:GUS*, (C) *pCLE4:GUS* and (D) *pCLE26:GUS* seedlings. Bars: 100 μm.



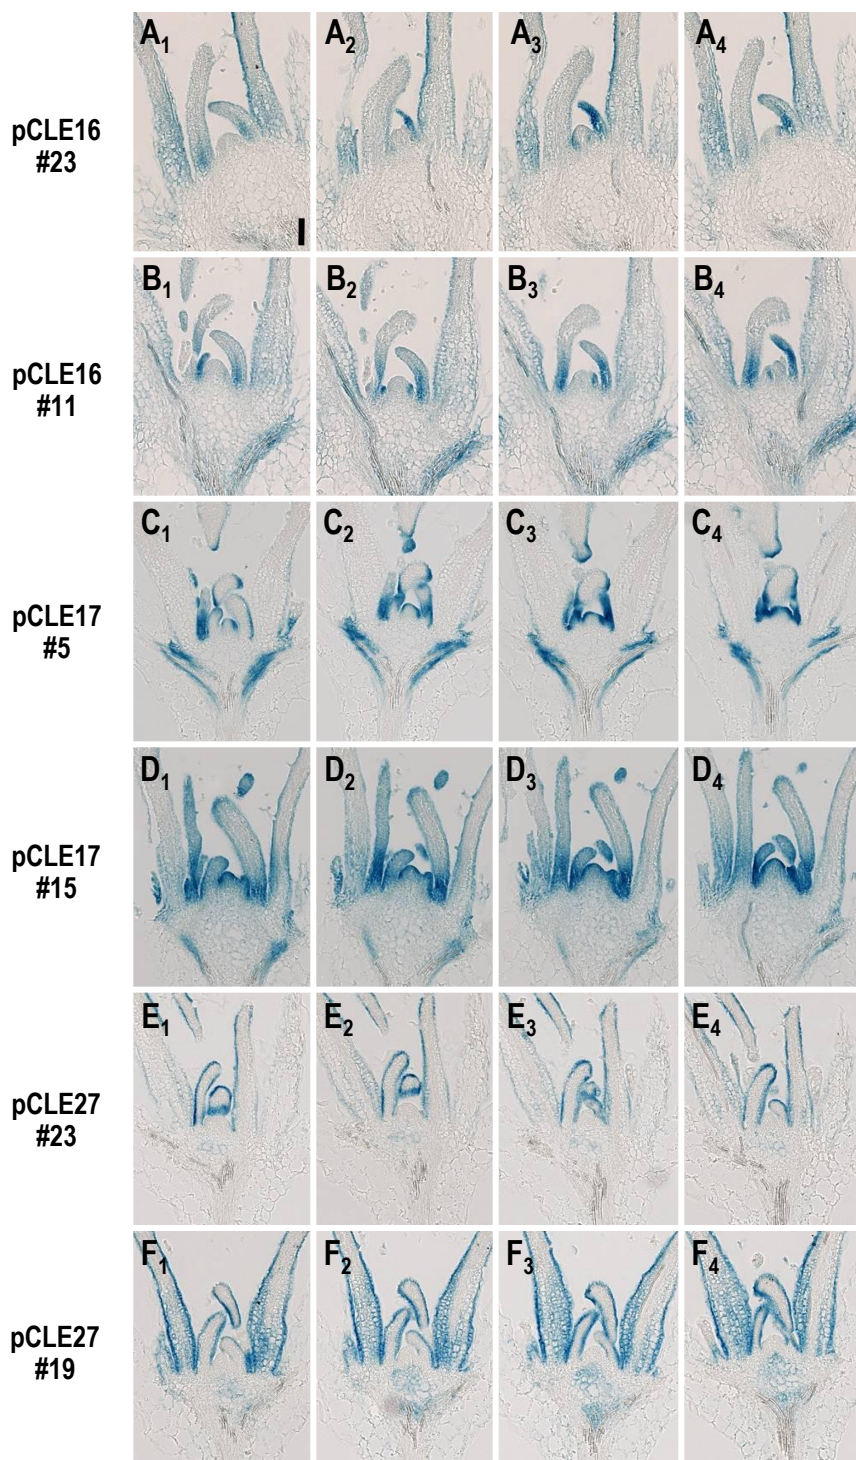

**Supplemental Figure 6.** *CLE16*, *CLE17* and *CLE27* promoter activity in the shoot apex. (A, B) Serial sections of 10-day-old p*CLE16*:*GUS* seedlings. (C, D) Serial sections of 10-day-old p*CLE17*:*GUS* seedlings. (E, F) Serial sections of 10-day-old p*CLE27*:*GUS* seedlings. The numbers at the left column indicate independently transformed lines. Bar: 100  $\mu$ m.

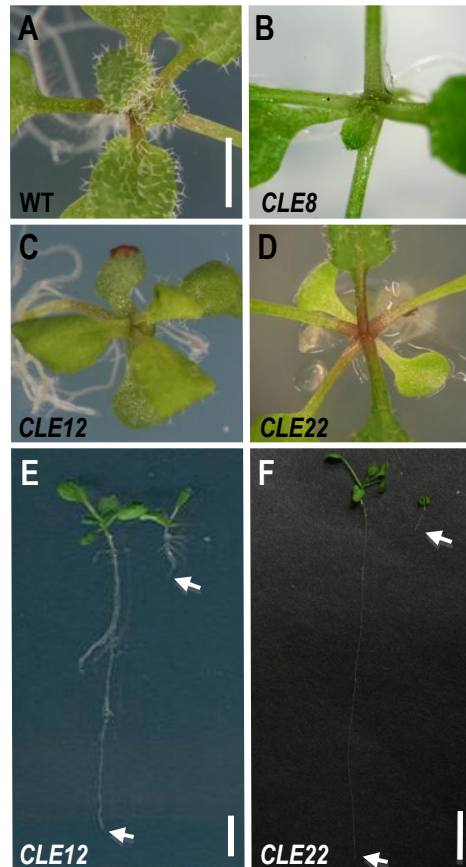

**Supplemental Figure 7.** *CLE8*, *CLE12* and *CLE22* over-expression phenotypes. (A) A 13-day-old wild-type seedling. (B) A 13-day-old *p35S:CLE8* seedling. (C) A 13-day-old *p35S:CLE12* seedling. (D) A 13-day-old *p35S:CLE22* seedling. (E) Comparison of root development between a 13-day-old wild-type (left) and a *p35S:CLE12* (right) seedling. (F) Comparison of root development between a 13-day-old wild-type (left) and a *p35S:CLE22* (right) seedling. Arrows indicate the locations of the root tips. Bars: A-D 2.5 mm; E-F 5 mm.
